# Supplementary material for: European primary emissions of criteria pollutants and greenhouse gases in 2020 modulated by the COVID-19 pandemic disruptions
Source: Copernicus journal article supplement (doi:10.5194/essd-2022-31), 2022-01-25
Supplement: Supplementary file 1 [file essd-2022-31-supplement.pdf]

## Supplementary material

Table S1: List of countries (sea regions) included in the COVID-19 emission adjustment factors per GNFR sector

| Sector                                   | Description                            | Countries included                                                                                                                                                                                                                                                                                                                                                                        |
|------------------------------------------|----------------------------------------|-------------------------------------------------------------------------------------------------------------------------------------------------------------------------------------------------------------------------------------------------------------------------------------------------------------------------------------------------------------------------------------------|
| GNFR_A                                   | Energy industry                        | 30: Austria, Belgium, Bulgaria, Czech Republic, Germany, Denmark, Estonia, Spain, Finland, France, United Kingdom, Greece, Croatia, Hungary, Ireland, Italy, Lithuania, Latvia, Netherlands, Norway, Poland, Portugal, Romania, Russia, Sweden, Switzerland, Slovakia, Slovenia, Turkey, Ukraine                                                                                          |
| GNFR_B                                   | Manufacturing industry                 | 32: Austria, Bosnia and Herzegovina, Belgium, Bulgaria, Switzerland, Czech Republic, Cyprus, Germany, Denmark, Estonia, Spain, France, Finland, United Kingdom, Greece, Croatia, Hungary, Italy, Lithuania, Latvia, Malta, Luxembourg, Netherlands, Norway, Poland, Portugal, Romania, Serbia, Sweden, Slovakia, Slovenia, Turkey                                                         |
| GNFR_C                                   | Other stationary combustion activities | 35: Austria, Bosnia and Herzegovina, Belgium, Bulgaria, Czech Republic, Switzerland, Germany, Denmark, Estonia, Spain, France, Finland, United Kingdom, Greece, Croatia, Hungary, Ireland, Italy, Lithuania, Latvia, Luxembourg, Malta, Moldova, Macedonia, Netherlands, Norway, Poland, Portugal, Romania, Russia, Sweden, Slovakia, Slovenia, Turkey, Ukraine                           |
| GNFR_D                                   | Fugitive emissions from fossil fuels   | 32: Austria, Bosnia and Herzegovina, Belgium, Bulgaria, Switzerland, Czech Republic, Cyprus, Germany, Denmark, Estonia, Spain, France, Finland, United Kingdom, Greece, Croatia, Hungary, Italy, Lithuania, Latvia, Malta, Luxembourg, Netherlands, Norway, Poland, Portugal, Romania, Serbia, Sweden, Slovakia, Slovenia, Turkey                                                         |
| GNFR_E                                   | Solvents                               | 23: Austria, Belgium, Bulgaria, Czech Republic, Germany, Denmark, Estonia, Spain, France, Finland, United Kingdom, Greece, Hungary, Italy, Lithuania, Latvia, Netherlands, Norway, Poland, Portugal, Romania, Sweden, Turkey                                                                                                                                                              |
| GNFR_F1<br>GNFR_F2<br>GNFR_F3<br>GNFR_F4 | Road Transport                         | 36: Austria, Bosnia and Herzegovina, Belgium, Belarus, Bulgaria, Czech Republic, Switzerland, Germany, Denmark, Estonia, Spain, France, Finland, United Kingdom, Greece, Croatia, Hungary, Ireland, Italy, Lithuania, Latvia, Luxembourg, Malta, Moldova, Macedonia, Netherlands, Norway, Poland, Portugal, Romania, Russia, Sweden, Slovakia, Slovenia, Turkey, Ukraine                  |
| GNFR_G                                   | Shipping                               | Atlantic Ocean, Baltic Sea, Black Sea, Caspian Sea, English Channel, Greenland Sea, Irish Sea, Kara Sea, Mediterranean Sea, North Sea, Norwegian Sea                                                                                                                                                                                                                                      |
| GNFR_H                                   | Aviation                               | 39: Albania, Armenia, Austria, Bosnia and Herzegovina, Belgium, Bulgaria, Switzerland, Cyprus, Czech Republic, Denmark, Germany, Estonia, Spain, Finland, France, United Kingdom, Greece, Croatia, Hungary, Ireland, Italy, Latvia, Luxembourg, Lithuania, Malta, Morocco, Moldova, Montenegro, Netherlands, Norway, Poland, Portugal, Romania, Serbia, Sweden, Slovakia, Turkey, Ukraine |
| GNFR_I                                   | Off-road transport                     | 32: Austria, Bosnia and Herzegovina, Belgium, Bulgaria, Switzerland, Czech Republic, Cyprus, Germany, Denmark, Estonia, Spain, France, Finland, United Kingdom, Greece, Croatia, Hungary, Italy, Lithuania, Latvia, Malta, Luxembourg, Netherlands, Norway, Poland, Portugal, Romania, Serbia, Sweden, Slovakia, Slovenia, Turkey                                                         |

**Table S2: Energy consumption by subsectors of the Spanish commercial/institutional sector (IDAE, 2018) and estimated changes in the energy demand due to the COVID-19 restrictions.**

|                                                                            | <b>Fossil fuel + biomass consumption (ktep)</b> | <b>Fossil fuel + biomass consumption (%)</b> | <b>Change due to COVID-19 restrictions</b> | <b>Change in consumption (%)</b> |
|----------------------------------------------------------------------------|-------------------------------------------------|----------------------------------------------|--------------------------------------------|----------------------------------|
| Workplaces                                                                 | 977                                             | 26.5%                                        | -80%                                       | -21.2%                           |
| Hospitals                                                                  | 428                                             | 11.6%                                        | 50%                                        | 5.8%                             |
| Commercial buildings                                                       | 1509                                            | 40.9%                                        | -80%                                       | -32.8%                           |
| Restaurants and hotels                                                     | 160                                             | 4.3%                                         | -90%                                       | -3.9%                            |
| Schools and universities                                                   | 287                                             | 7.8%                                         | -100%                                      | -7.8%                            |
| Other buildings                                                            | 325                                             | 8.8%                                         | -80%                                       | -7.0%                            |
| <b>Overall change in fossil fuel + biomass consumption due to COVID-19</b> |                                                 |                                              |                                            | <b>-66.9%</b>                    |

GNFR\_A: Public Power

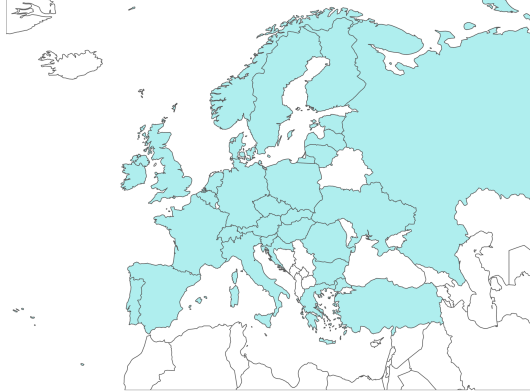

GNFR\_B: Manufacturing Industry

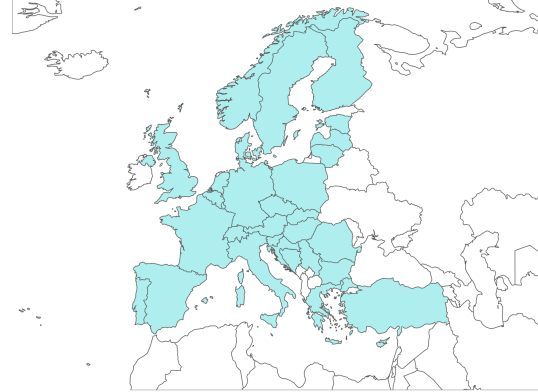

GNFR\_C: Other Stationary Combustion Activities

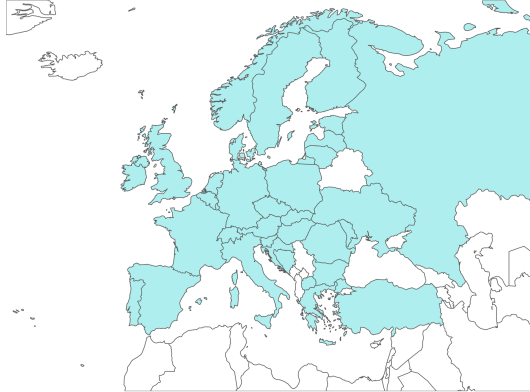

GNFR\_D: Fugitive Emissions from Fossil Fuels

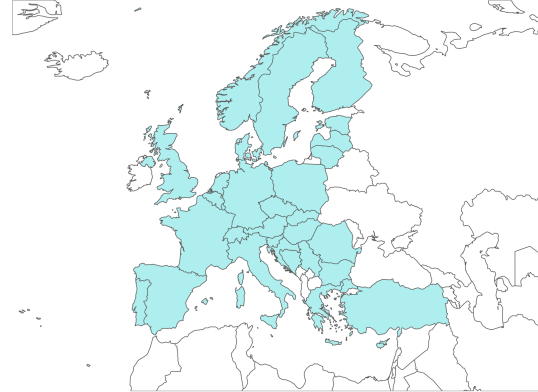

GNFR\_E: Solvents

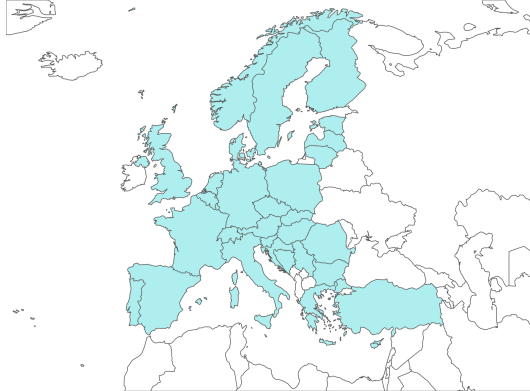

GNFR\_F: Road Transport

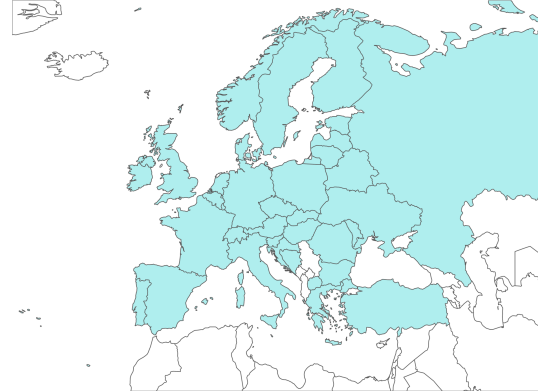

GNFR\_H: Aviation

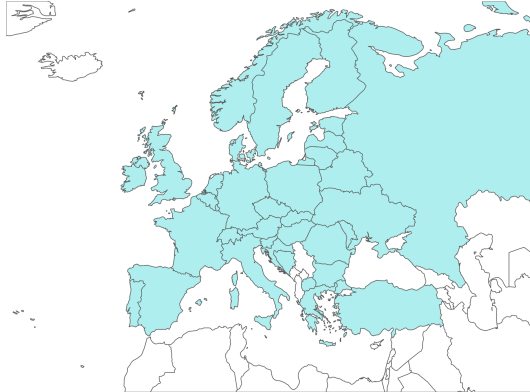

GNFR\_I: Off-road Transport

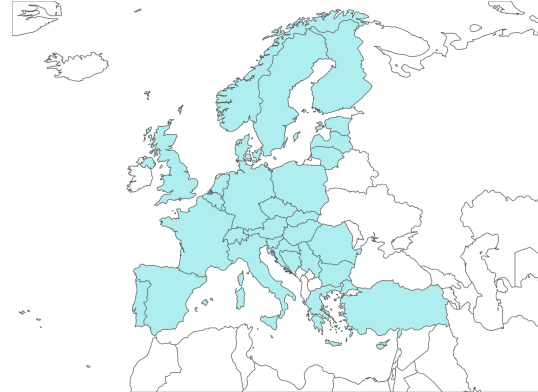

**Figure S1: Spatial coverage of the COVID-19 emission adjustment factors constructed for each GNFR sector. Countries included in the database are highlighted in light turquoise**

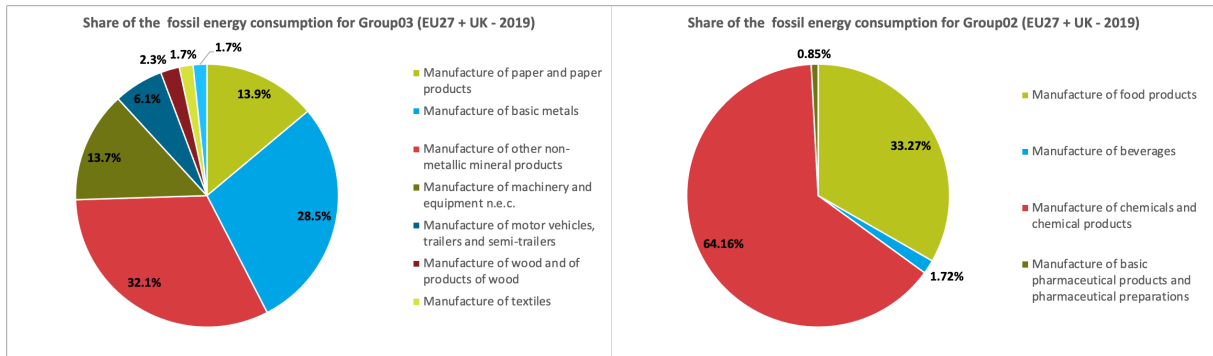

**Figure S2: Relative fossil energy consumption in the GNFR\_B3 - Manufacture of other products (left) and GNFR\_B2 - Manufacture of pharmaceutical, chemistry, food and beverages products – (right) manufacturing industry subcategories per industrial branch in the EU27 + UK during 2019 (Eurostat, 2021).**

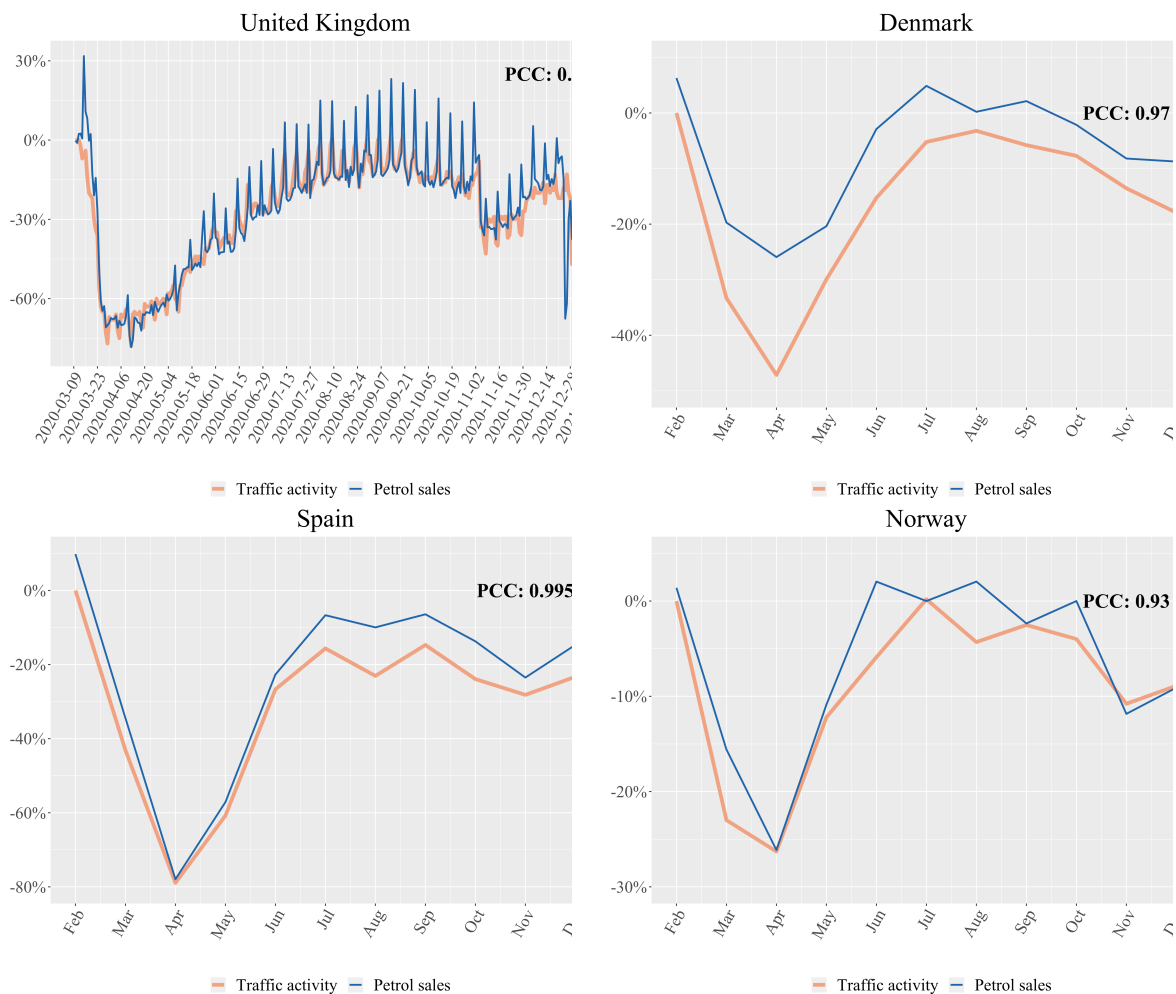

**Figure S3: Weekly (UK) and monthly (Denmark, Spain, Norway) changes in traffic activity (orange line) and petrol sales (blue line) due to COVID-19 restrictions during 2020. Correlation between the two parameters is represented with the Pearson correlation coefficient (PCC).**

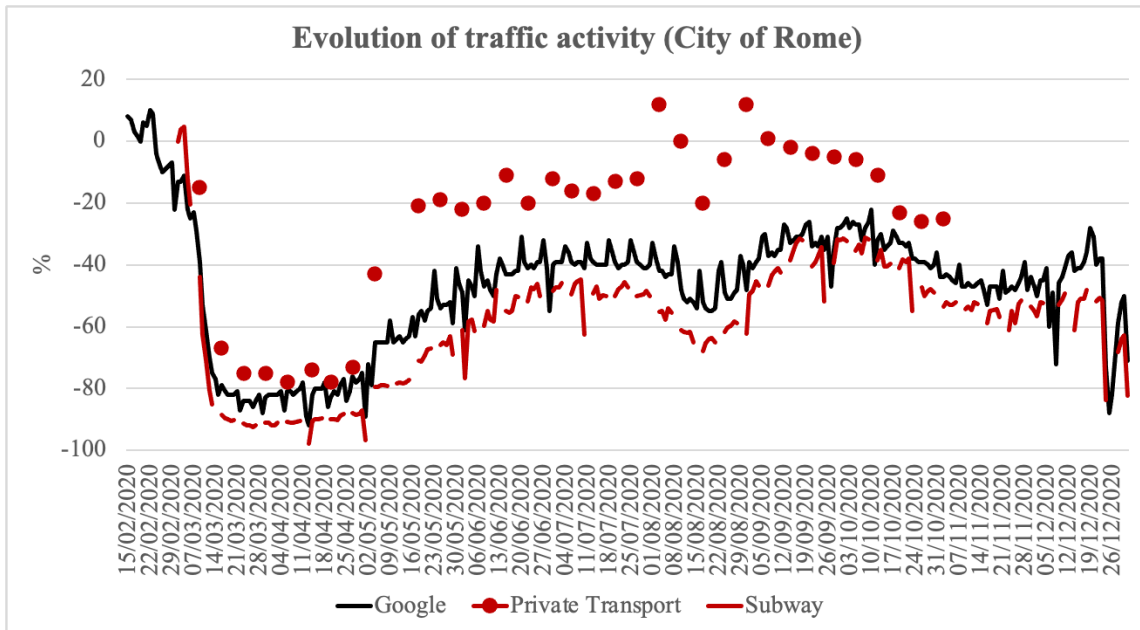

Figure S4: Comparison of Google LCC (2021) traffic movement trends with the evolution of the private transport and access to subway reported by Roma Mobilita (2021) for the city of Rome and the period 21 February to 31 December 2020.

## References

Eurostat: Energy balances – 2021 edition. Available at: <https://ec.europa.eu/eurostat/web/energy/data/energy-balances> (last accessed, July 2021), 2021.

Google LLC. Google COVID-19 Community Mobility Reports. Available at: <https://www.google.com/covid19/mobility/> (last access: March 2021), 2021.

IDAE. Institute for Diversification and Saving of Energy. Detail of service sector consumption. Available at: <https://www.idae.es/en/studies-reports-and-statistics> (last access: September 2020), 2018.

Roma Mobilita: COVID-19: impact on mobility. Available at: <https://romamobilita.it/it/covid-19-impatto-sulla-mobilita> (last accessed, May 2021), 2021.
